# Supplementary material for: Factors associated with prolonged duration of ultrasound-guided brachial plexus block for the upper limb fracture surgery: a cross-sectional study
Source: PubMed Central journal article supplement — Ann Transl Med. 2023 Jan 31;11(2):49. doi: 10.21037/atm-22-6365 (PMC9929803; doi:10.21037/atm-22-6365), 2023-01-31
Supplement: atm-11-02-49-dss.pdf [file atm-11-02-49-dss.pdf]

## Data Sharing Statement

|                     |                                                                                                                                                     |                                                                                                                                                                                                                                                                  |
|---------------------|-----------------------------------------------------------------------------------------------------------------------------------------------------|------------------------------------------------------------------------------------------------------------------------------------------------------------------------------------------------------------------------------------------------------------------|
| <b>Article Info</b> | <a href="https://dx.doi.org/10.21037/atm-22-6365">https://dx.doi.org/10.21037/atm-22-6365</a>                                                       |                                                                                                                                                                                                                                                                  |
| <b>Item</b>         | <b>Question</b>                                                                                                                                     | <b>Authors' Response<br/>(place "-" if not applicable)</b>                                                                                                                                                                                                       |
| 1                   | Would you like to share data collected for your study to others?                                                                                    | Yes.                                                                                                                                                                                                                                                             |
| 2                   | If not, would you like to share the reason for your decision?                                                                                       | -                                                                                                                                                                                                                                                                |
| 3                   | What data in particular will be shared?                                                                                                             | The multivariable logistic regression data in particular will be shared, and we also found gender, age, ALT, and decrease in GFR are risk factors affecting the duration of US-guided brachial plexus block, which has seldom been provided in previous studies. |
| 4                   | Any other documents will be shared? Such as study protocol, statistical analysis plan, informed consent form, clinical study report, analytic code. | Statistical analysis plan, informed consent form, and clinical study report will also be shared if requested.                                                                                                                                                    |
| 5                   | When will data availability begin?                                                                                                                  | From the publication date.                                                                                                                                                                                                                                       |
| 6                   | When will data availability end?                                                                                                                    | Two years within the publication date, since the technique may be updated over time.                                                                                                                                                                             |
| 7                   | To whom will you share the data?                                                                                                                    | Medical anesthesiologists who are interested in studies of ultrasound-guided brachial plexus block.                                                                                                                                                              |
| 8                   | For what type of analysis or purpose?                                                                                                               | For analysis to evaluate the duration of ultrasound-guided brachial plexus block.                                                                                                                                                                                |
| 9                   | How or where can the data/documents be obtained?                                                                                                    | Emails could be sent to the address below to obtain the shared data:<br>zjq17321438991@163.com.                                                                                                                                                                  |
| 10                  | Any other restrictions?                                                                                                                             | We may balance the potential benefits and risks for each request and then provide the data that could be shared.                                                                                                                                                 |
